# Supplementary material
Source: PubMed Central journal article supplement (PMC9547069)
Supplement: 41421_2022_463_MOESM1_ESM.pdf [file 41421_2022_463_MOESM1_ESM.pdf]

1 **Supplementary Materials for**

2  
3  
4 **Combating the SARS-CoV-2 Omicron (BA.1) and BA.2 with potent**  
5 **bispecific antibodies engineered from non-Omicron neutralizing**  
6 **antibodies**

7 Yingdan Wang<sup>1#</sup>, Xiang Zhang<sup>1#</sup>, Yunping Ma<sup>1,2#</sup>, Yanqun Wang<sup>3#</sup>, Wuqiang Zhan<sup>1</sup>, Qinwen  
8 Zheng<sup>1</sup>, Meng Zhang<sup>1</sup>, Ping Ji<sup>1</sup>, Mei Liu<sup>1</sup>, Qianying Liu<sup>1</sup>, Tingting Sun<sup>1</sup>, Tongyu Zhu<sup>1</sup>, Yumei  
9 Wen<sup>1</sup>, Lei Sun<sup>1\*</sup>, Jincun Zhao<sup>3,4,5\*</sup>, Fan Wu<sup>2\*</sup>, Zhenguo Chen<sup>1\*</sup>, Jinghe Huang<sup>1\*</sup>

10  
11 <sup>1</sup>Key Laboratory of Medical Molecular Virology (MOE/NHC/CAMS) and Shanghai Institute of  
12 Infectious Disease and Biosecurity, the Fifth People's Hospital of Shanghai, Shanghai Public Health  
13 Clinical Center, Institutes of Biomedical Sciences, School of Basic Medical Sciences, Fudan  
14 University, Shanghai, China.

15 <sup>2</sup>Shanghai Immune Therapy Institute, Shanghai Jiao Tong University School of Medicine  
16 Affiliated Renji Hospital, Shanghai, China.

17 <sup>3</sup>State Key Laboratory of Respiratory Disease, National Clinical Research Center for Respiratory  
18 Disease, Guangzhou Institute of Respiratory Health, the First Affiliated Hospital of Guangzhou  
19 Medical University, Guangzhou, Guangdong, China;

20 <sup>4</sup>Institute of Infectious Disease, Guangzhou Eighth People's Hospital of Guangzhou Medical  
21 University, Guangzhou, Guangdong, China.

22 <sup>5</sup>Guangzhou Laboratory, Bio-island, Guangzhou 510320, China

23  
24 #These authors contributed equally.

25 \*Correspondence to: [llsun@fudan.edu.cn](mailto:llsun@fudan.edu.cn), [zhaojincun@gird.cn](mailto:zhaojincun@gird.cn), [wufan@renji.com](mailto:wufan@renji.com),  
26 [ZhenguoChen@fudan.edu.cn](mailto:ZhenguoChen@fudan.edu.cn), or [jinghehuang@fudan.edu.cn](mailto:jinghehuang@fudan.edu.cn).

27  
28 **Keywords:** COVID-19; SARS-CoV-2; Bispecific antibodies; Omicron; BA.2

29

**Table S1. Mutations in spike proteins of Omicron, BA.1.1, BA.2 and BA.3.**

30

| Spkie     | Muation  | BA.1  | BA.1.1 | BA.2 | BA.3 |  |
|-----------|----------|-------|--------|------|------|--|
| NTD       | T19I     |       |        |      |      |  |
|           | Δ24-26   |       |        |      |      |  |
|           | A27S     |       |        |      |      |  |
|           | A67V     |       |        |      |      |  |
|           | Δ69-70   |       |        |      |      |  |
|           | T95I     |       |        |      |      |  |
|           | G142D    |       |        |      |      |  |
|           | Δ143-145 |       |        |      |      |  |
|           | Δ211     |       |        |      |      |  |
|           | L212I    |       |        |      |      |  |
|           | V213G    |       |        |      |      |  |
| ins214EPE |          |       |        |      |      |  |
| RBD       | G339D    |       |        |      |      |  |
|           | R346K    |       |        |      |      |  |
|           | S371L/F  | L     | L      | F    | F    |  |
|           | S373P    |       |        |      |      |  |
|           | S375F    |       |        |      |      |  |
|           | T376A    |       |        |      |      |  |
|           | D405N    |       |        |      |      |  |
|           | R408S    |       |        |      |      |  |
|           | K417N    |       |        |      |      |  |
|           | RBM      | N440K |        |      |      |  |
|           |          | G446S |        |      |      |  |
|           |          | S477N |        |      |      |  |
|           |          | T478K |        |      |      |  |
|           |          | E484A |        |      |      |  |
|           |          | Q493R |        |      |      |  |
|           |          | G496S |        |      |      |  |
|           |          | Q498R |        |      |      |  |
|           |          | N501Y |        |      |      |  |
|           |          | Y505H |        |      |      |  |
| SD1       | T547K    |       |        |      |      |  |
| SD2       | D614G    |       |        |      |      |  |
|           | H655Y    |       |        |      |      |  |
|           | N679K    |       |        |      |      |  |
|           | P681H    |       |        |      |      |  |
| FP        | N764K    |       |        |      |      |  |
|           | D796Y    |       |        |      |      |  |
|           | N856K    |       |        |      |      |  |
| HR1       | Q954H    |       |        |      |      |  |
|           | N969K    |       |        |      |      |  |
|           | L981F    |       |        |      |      |  |

31

32

33

34

35

36

37

38

39

40 **Table S2. The germline and CDRH3 sequences of GW01, 4L12, and 16L9.**

| Donor ID | mAb ID | VH       | CDRH3 sequence       | VL       | CDRL3 sequence |
|----------|--------|----------|----------------------|----------|----------------|
| Donor 1  | GW01   | IGHV3-43 | AKDRSYGPPDVFNYEYGMDV | IGLV1-44 | AAWDDSLNWV     |
| Donor 1  | 4L12   | IGHV3-66 | ARDLITYGMDV          | IGKV1-9  | QQLNSYPPLT     |
| Donor 2  | 16L9   | IGHV3-53 | ARGEIQPYYYYGMDV      | IGLV2-8  | SSYAGSSNFDV    |

41

42 **Table S3. Cryo-EM data collection and refinement statistics of SARS-CoV-2**  
 43 **complexed with IgG FD01.**

44

|                                        | State 1 | State 2 | State 3 | State 4      | State 5 | State 6 | Local<br>refine NRF |
|----------------------------------------|---------|---------|---------|--------------|---------|---------|---------------------|
| <b>Data collection and processing</b>  |         |         |         |              |         |         |                     |
| Magnification                          |         |         |         | 81,000       |         |         |                     |
| Voltage (kV)                           |         |         |         | 300          |         |         |                     |
| Electron exposure (e-/Å <sup>2</sup> ) |         |         |         | 58           |         |         |                     |
| Defocus range (µm)                     |         |         |         | -1.2 to -2.5 |         |         |                     |
| Pixel size (Å)                         |         |         |         | 1.064        |         |         |                     |
| Initial particles (no.)                |         |         |         | 1,003,956    |         |         |                     |
| Symmetry imposed                       |         |         |         | C1           |         |         |                     |
| Final particles (no.)                  | 194,026 | 62,040  | 74,415  | 141,577      | 39,294  | 71,568  | 249,122             |
| Map resolution (Å)                     | 3.47    | 3.70    | 3.91    | 3.47         | 3.87    | 6.11    | 3.51                |
| <b>Refinement</b>                      |         |         |         |              |         |         |                     |
| R.m.s. deviations                      |         |         |         |              |         |         |                     |
| Bond lengths (Å)                       | 0.003   | 0.003   | 0.003   | 0.003        | 0.003   | 0.002   | 0.002               |
| Bond angles (°)                        | 0.539   | 0.506   | 0.499   | 0.557        | 0.527   | 0.437   | 0.524               |
| Validation                             |         |         |         |              |         |         |                     |
| MolProbity score                       | 2.52    | 2.48    | 2.46    | 2.50         | 2.53    | 2.41    | 2.88                |
| Clashscore                             | 9.18    | 8.06    | 8.38    | 8.44         | 8.14    | 7.67    | 10.97               |
| Rotamer outlier (%)                    | 5.14    | 5.34    | 5.30    | 5.39         | 5.97    | 5.33    | 9.21                |
| Ramachandran plot                      |         |         |         |              |         |         |                     |
| Favored (%)                            | 91.75   | 92.00   | 92.74   | 91.84        | 91.67   | 93.20   | 88.62               |
| Allowed (%)                            | 7.95    | 7.90    | 7.14    | 8.13         | 8.17    | 6.80    | 11.38               |
| Disallowed (%)                         | 0.30    | 0.11    | 0.13    | 0.03         | 0.16    | 0.00    | 0.00                |
| <b>EMDB</b>                            | 32655   | 32656   | 32657   | 32659        | 32660   | 32661   | 32654               |
| <b>PDB</b>                             | 7WOQ    | 7WOR    | 7WOS    | 7WOU         | 7WOV    | 7WOW    | 7WOP                |

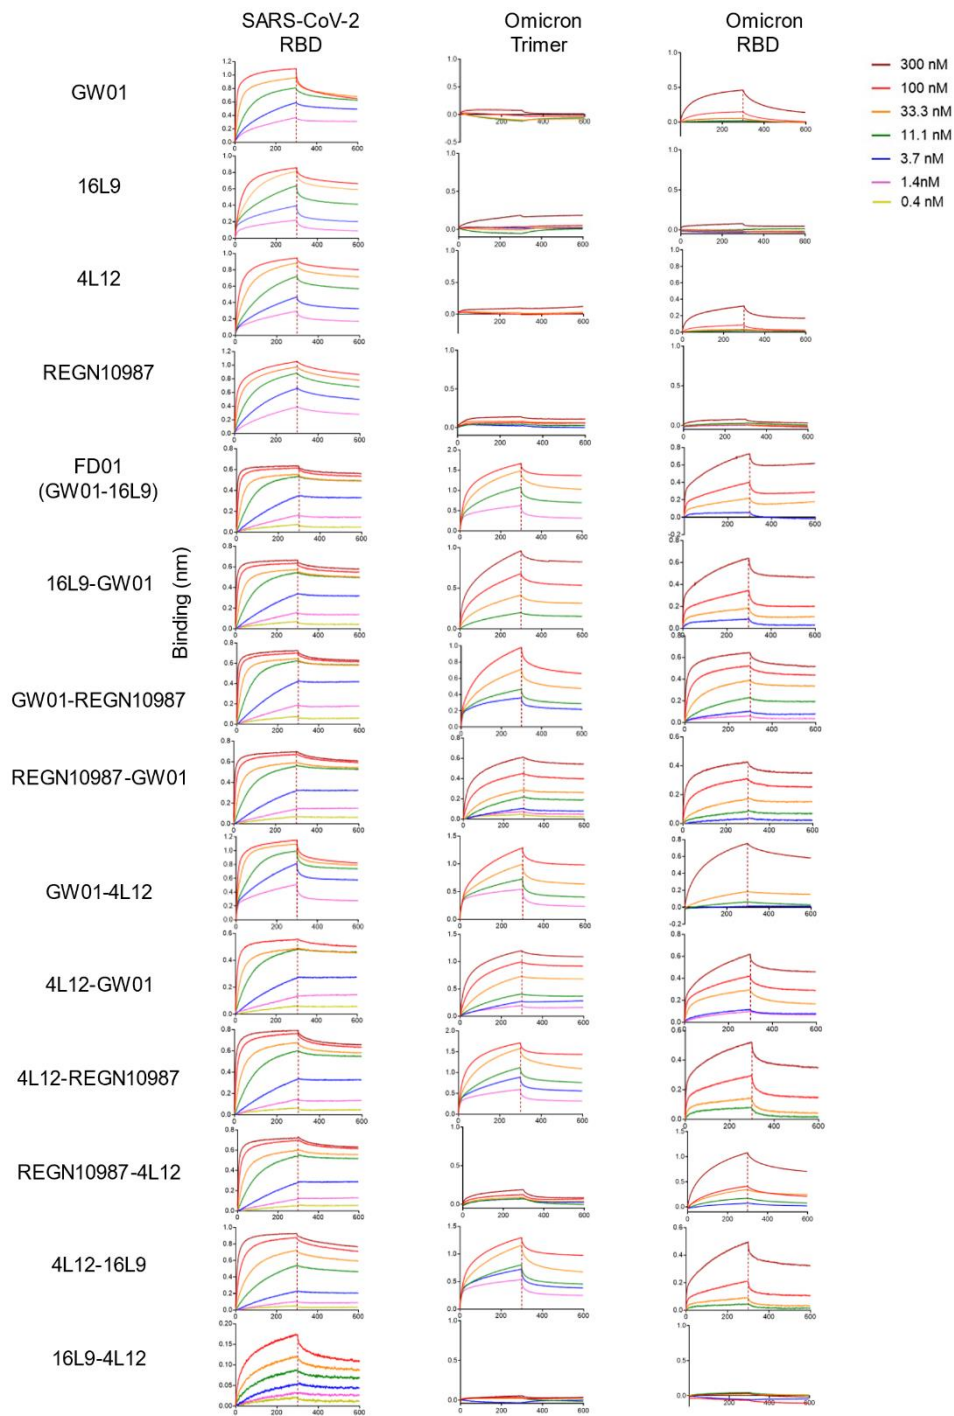

46

47 **Fig. S1. Binding affinities of GW01, 16L9, 4L12, REGN10987, and ten bispecific**  
 48 **antibodies to SARS-CoV-2 RBD-his, Omicron trimer-his and Omicron RBD-his**  
 49 **measured by bilayer interferometry.** Antibodies were immobilized on anti-human  
 50 IgG (AHC) biosensors and then tested for their binding abilities to the target proteins.

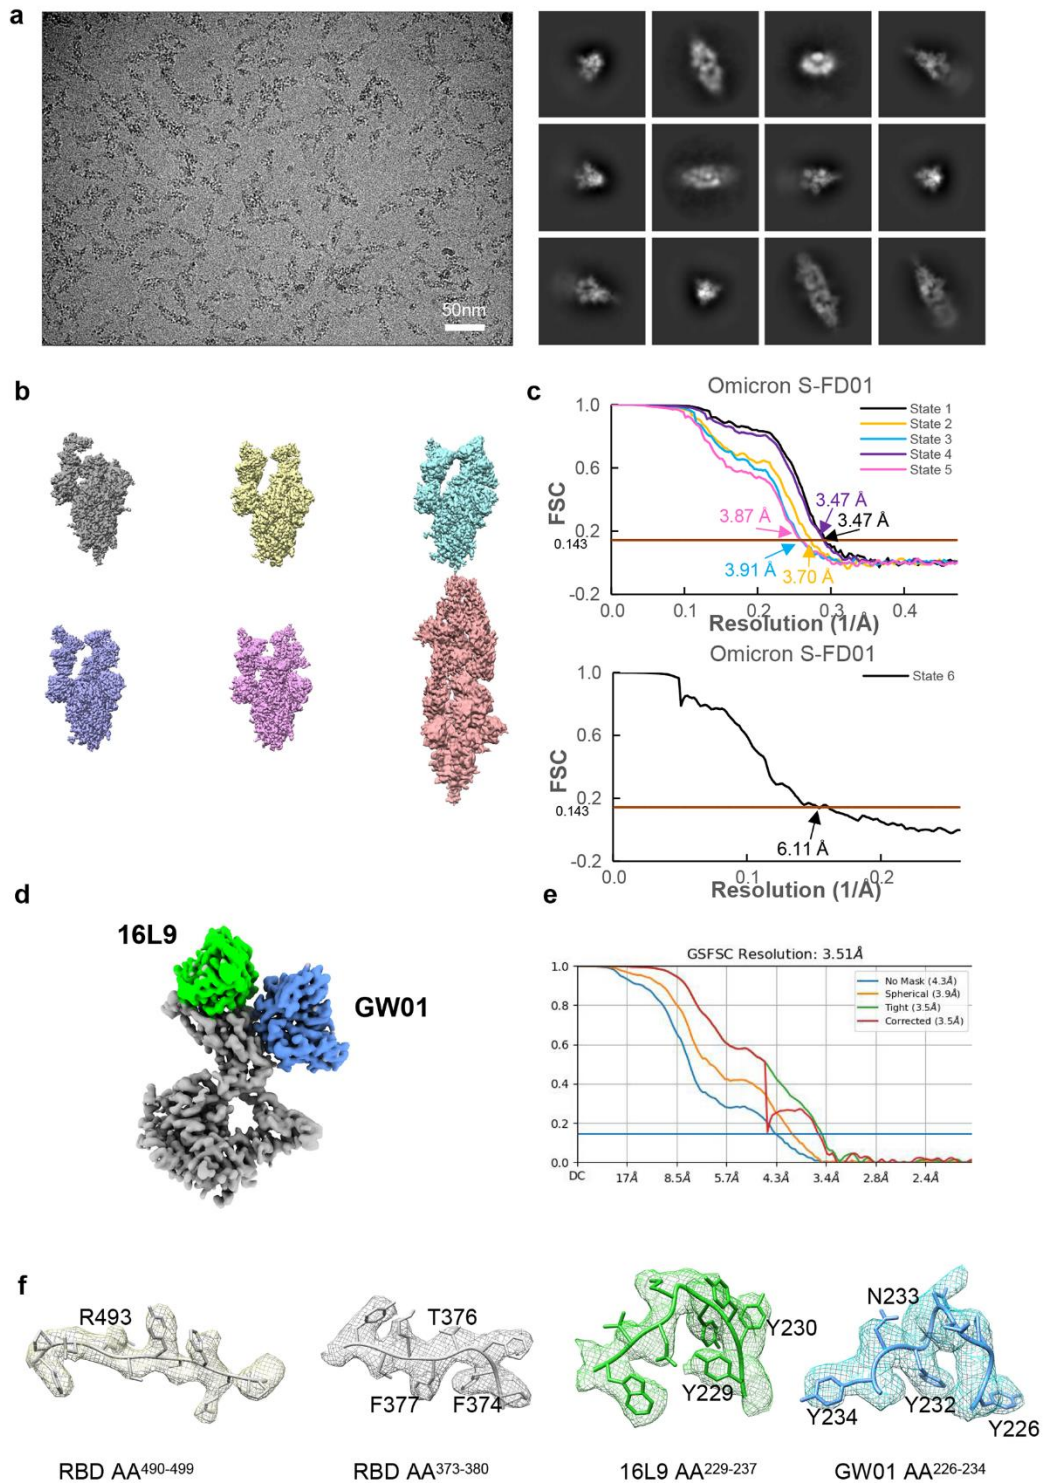

51

52

53 **Fig. S2. Cryo-EM data collection and processing of FD01 bound SARS-CoV-2**

54 **Omicron S. (a)** Representative electron micrograph and 2D classification results of

55 **FD01 bound SARS-CoV-2 S. (b)** The reconstruction map of the complex structures at

56 six states. **(c)** Gold-standard Fourier shell correlation curves generated in RELION for  
57 structures of six states. The 0.143 cut-off is indicated by a horizontal dashed line. **(d)**  
58 The local-refined map of the NRF region. **(e)** Gold-standard Fourier shell correlation  
59 curves generated in cryoSPARC for local-refined map. **(f)** Density maps of residues  
60 around the interface.  
61

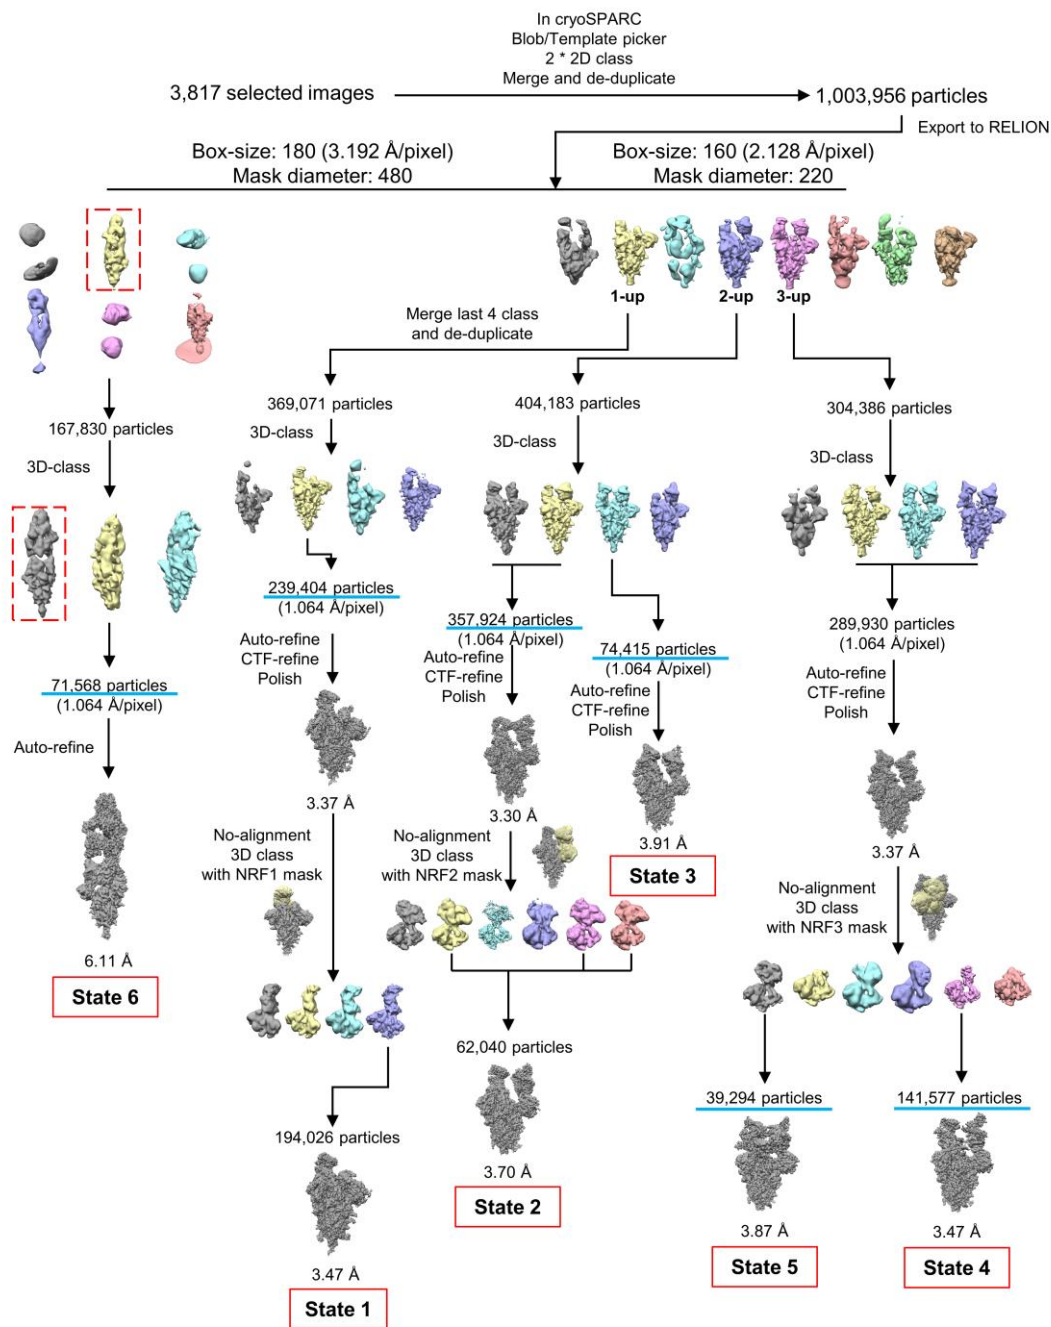

62 **Fig. S3. Data processing flowchart of FD01 bound SARS-CoV-2 Omicron S**  
 63 **trimer.** Particles number above cyan line is used for particle counting statistics.



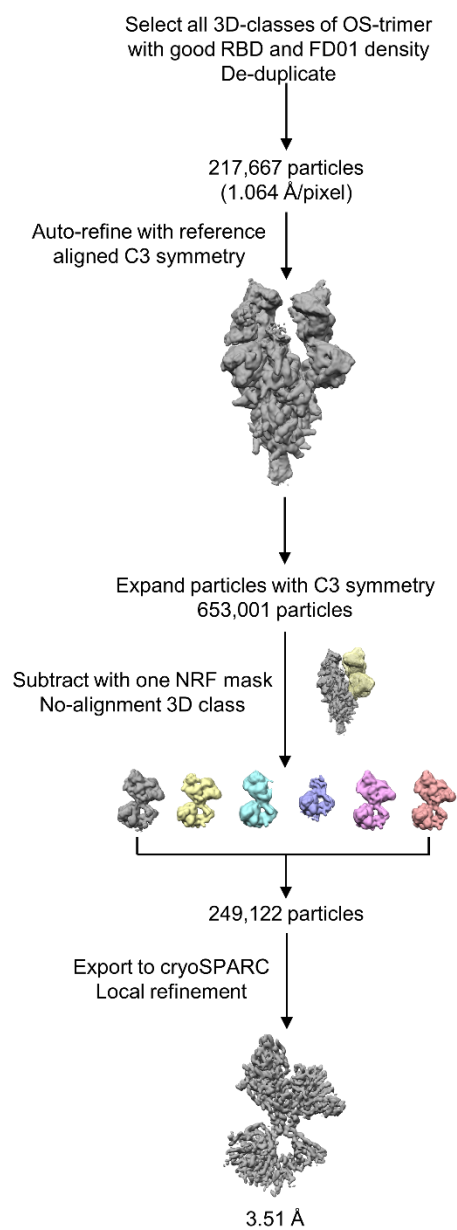

64

65 **Fig. S4. Data processing flowchart of local refinement of RBD-FD01.**

66

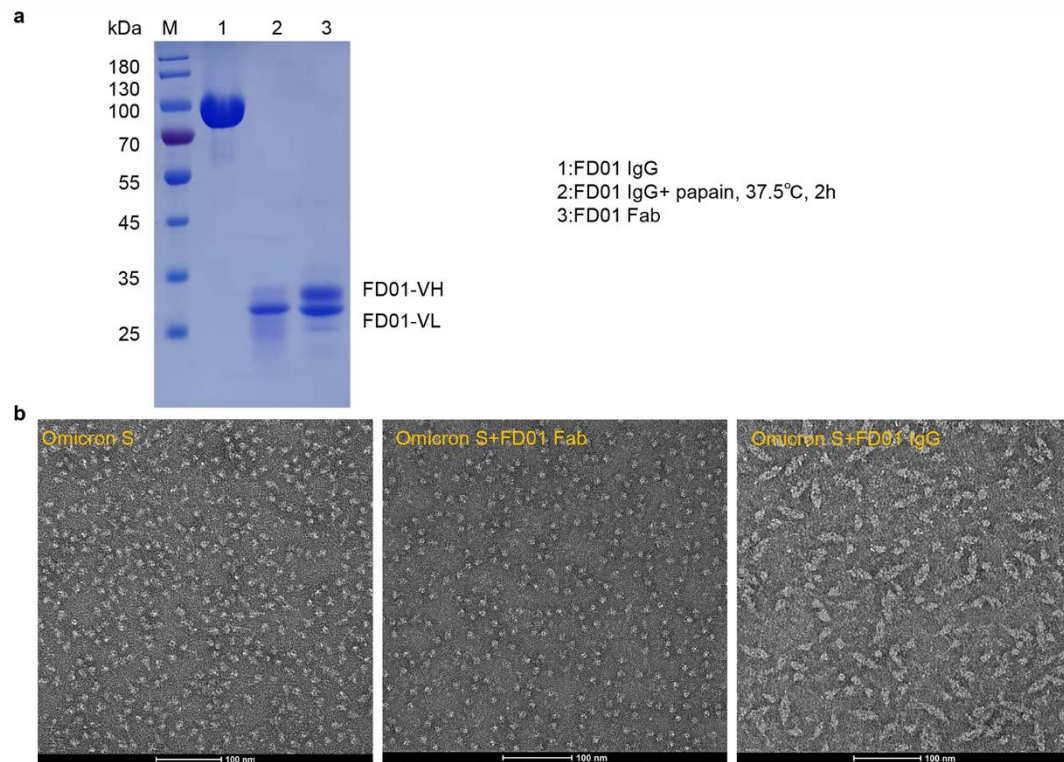

67 **Fig. S5. IgG FD01 crosslinks Omicron S trimers to form trimer dimer**  
 68 **conformation. (a)** SDS-PAGE of the FD01 in IgG and Fab form; **(b)** Negative stain  
 69 images of Omicron S trimer-FD01 Fab and Omicron S trimer-FD01 IgG, showing that  
 70 only IgG FD01 can induce the formation of trimer dimer.  
 71

|                   |                                                                        |     |     |     |     |     |
|-------------------|------------------------------------------------------------------------|-----|-----|-----|-----|-----|
|                   | 340                                                                    | 350 | 360 | 370 | 380 | 390 |
| WT                | NITNLCPPGEEVFNATRFASVYAWNRRKRISNCVADYSVLYNSASFSSTFKCYGVSPTKLNLDLCFTNVY |     |     |     |     |     |
| D614G             | NITNLCPPGEEVFNATRFASVYAWNRRKRISNCVADYSVLYNSASFSSTFKCYGVSPTKLNLDLCFTNVY |     |     |     |     |     |
| alpha_B.1.17      | NITNLCPPGEEVFNATRFASVYAWNRRKRISNCVADYSVLYNSASFSSTFKCYGVSPTKLNLDLCFTNVY |     |     |     |     |     |
| Beta_B.1.351      | NITNLCPPGEEVFNATRFASVYAWNRRKRISNCVADYSVLYNSASFSSTFKCYGVSPTKLNLDLCFTNVY |     |     |     |     |     |
| Gamma_P1          | NITNLCPPGEEVFNATRFASVYAWNRRKRISNCVADYSVLYNSASFSSTFKCYGVSPTKLNLDLCFTNVY |     |     |     |     |     |
| Delta_B.1.617.2   | NITNLCPPGEEVFNATRFASVYAWNRRKRISNCVADYSVLYNSASFSSTFKCYGVSPTKLNLDLCFTNVY |     |     |     |     |     |
| Omicron_B.1.1.529 | NITNLCPPGEEVFNATRFASVYAWNRRKRISNCVADYSVLYNLAPFFTFKCYGVSPTKLNLDLCFTNVY  |     |     |     |     |     |

▲▲ ▲▲▲▲▲▲ ▲▲

|                   |                                                                     |     |     |     |     |     |     |
|-------------------|---------------------------------------------------------------------|-----|-----|-----|-----|-----|-----|
|                   | 400                                                                 | 410 | 420 | 430 | 440 | 450 | 460 |
| WT                | ADSFVIRGDEVROIAPGQTGKIADYNYKLPDDFTGCVIAWNSNNLDSKVGGNYNLYRFLFRKSNLK  |     |     |     |     |     |     |
| D614G             | ADSFVIRGDEVROIAPGQTGKIADYNYKLPDDFTGCVIAWNSNNLDSKVGGNYNLYRFLFRKSNLK  |     |     |     |     |     |     |
| alpha_B.1.17      | ADSFVIRGDEVROIAPGQTGKIADYNYKLPDDFTGCVIAWNSNNLDSKVGGNYNLYRFLFRKSNLK  |     |     |     |     |     |     |
| Beta_B.1.351      | ADSFVIRGDEVROIAPGQTGKIADYNYKLPDDFTGCVIAWNSNNLDSKVGGNYNLYRFLFRKSNLK  |     |     |     |     |     |     |
| Gamma_P1          | ADSFVIRGDEVROIAPGQTGKIADYNYKLPDDFTGCVIAWNSNNLDSKVGGNYNLYRFLFRKSNLK  |     |     |     |     |     |     |
| Delta_B.1.617.2   | ADSFVIRGDEVROIAPGQTGKIADYNYKLPDDFTGCVIAWNSNNLDSKVGGNYNLYRFLFRKSNLK  |     |     |     |     |     |     |
| Omicron_B.1.1.529 | ADSFVIRGDEVROIAPGQTGNLADYNYKLPDDFTGCVIAWNSNNLDSKVS GNYNLYRFLFRKSNLK |     |     |     |     |     |     |

▲▲▲ ▲▲▲ ▲▲▲▲ ▲▲ ▲▲▲▲▲▲ ▲▲▲▲▲▲▲▲

|                   |                                                                       |     |     |     |     |     |
|-------------------|-----------------------------------------------------------------------|-----|-----|-----|-----|-----|
|                   | 470                                                                   | 480 | 490 | 500 | 510 | 520 |
| WT                | PFERDISTEIIYQACSTPCNGVEGFNCYFPLQSYGFQPTNGVGYOPYRVVVLSEFELLHAPATVCGPK  |     |     |     |     |     |
| D614G             | PFERDISTEIIYQACSTPCNGVEGFNCYFPLQSYGFQPTNGVGYOPYRVVVLSEFELLHAPATVCGPK  |     |     |     |     |     |
| alpha_B.1.17      | PFERDISTEIIYQACSTPCNGVEGFNCYFPLQSYGFQPTNGVGYOPYRVVVLSEFELLHAPATVCGPK  |     |     |     |     |     |
| Beta_B.1.351      | PFERDISTEIIYQACSTPCNGVEGFNCYFPLQSYGFQPTNGVGYOPYRVVVLSEFELLHAPATVCGPK  |     |     |     |     |     |
| Gamma_P1          | PFERDISTEIIYQACSTPCNGVEGFNCYFPLQSYGFQPTNGVGYOPYRVVVLSEFELLHAPATVCGPK  |     |     |     |     |     |
| Delta_B.1.617.2   | PFERDISTEIIYQACSTPCNGVEGFNCYFPLQSYGFQPTNGVGYOPYRVVVLSEFELLHAPATVCGPK  |     |     |     |     |     |
| Omicron_B.1.1.529 | PFERDISTEIIYQACSTPCNGVAGFNCFYFPLRSYSFRPTYGVGHOPYRVVVLSEFELLHAPATVCGPK |     |     |     |     |     |

▲▲▲▲▲▲ ▲▲ ▲▲▲▲▲▲ ▲▲▲▲▲▲▲▲ ▲▲▲▲▲▲▲▲

72  
73  
74  
75  
76  
77  
78  
79  
80  
81  
82  
83  
84  
85  
86  
87  
88  
89  
90  
91  
92  
93  
94  
95  
96

**Fig. S6. Sequence alignment of SARS-CoV-2 WT and all VOCs RBDs.** Conserved amino acids are highlighted as red. Residues involved in 16L9 or GW01 are marked with triangles in green or magenta, respectively. Residues involved in both 16L9 and GW01 binding are marked with triangles in blue.

97

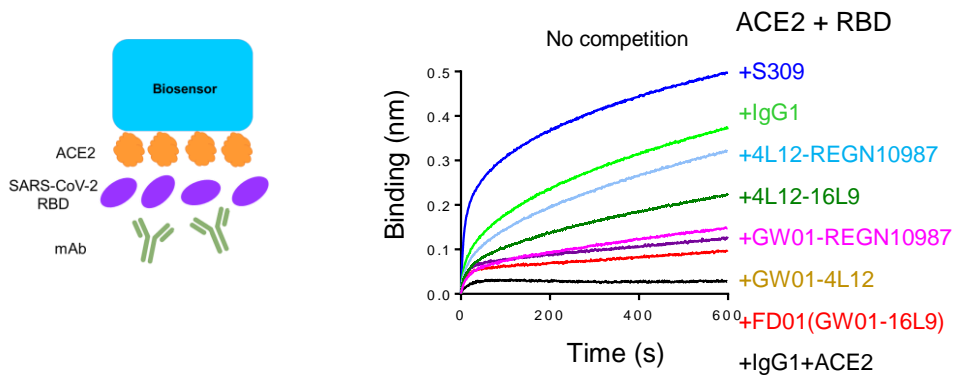

98

99

100 **Fig. S7. Five representative bispecific antibodies block RBD binding to ACE2.**

101 Binding of ACE2 to the SARS-CoV-2 RBD in competition with bispecific antibodies

102 (red), S309 (blue), control IgG1 (green), and IgG1+ACE2 (black).

103

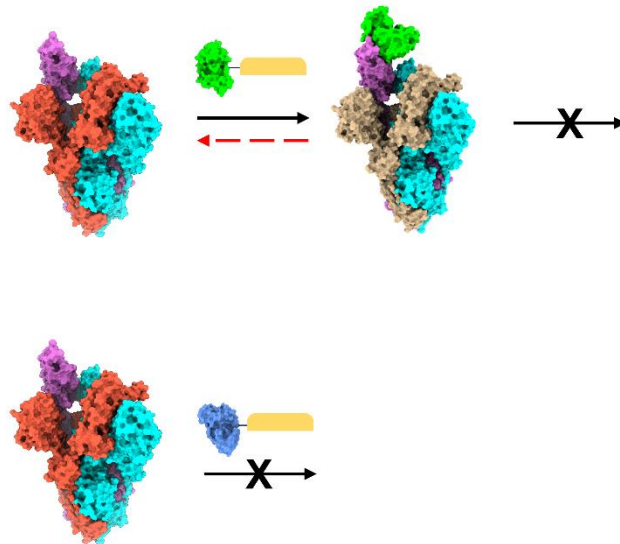

104

105 **Fig. S8. Hypothesis of binding features when Omicron S trimer meets with mAbs**  
106 **of 16L9 or GW01.**

107

108

109

110

111

112

113

114

115

116

117

118

119

120

121

122

123

124

125

126

127

128

129

130

131

132 **Supplementary Video: Conformation transitions of Omicron S trimer and the**  
133 **representative bispecific antibody GW01-16L9 (FD01) in six states.**
